# Supplementary material for: Auditory–Perceptual and Auditory–Motor Timing Abilities in Children with Developmental Coordination Disorder: A Scoping Review
Source: MDPI journal article supplement (doi:10.3390/brainsci13050729), 2023-04-27
Supplement: s1 [file s1]

**Supplementary Table S1. Search Strategy.**

|                |                                                                         |                                                                                                                                                                                                                                                                                                                   |     |                                                        |                                                                                                                                                                                                                                                                                                                                                                        |
|----------------|-------------------------------------------------------------------------|-------------------------------------------------------------------------------------------------------------------------------------------------------------------------------------------------------------------------------------------------------------------------------------------------------------------|-----|--------------------------------------------------------|------------------------------------------------------------------------------------------------------------------------------------------------------------------------------------------------------------------------------------------------------------------------------------------------------------------------------------------------------------------------|
| Database       | Medline (Ovid)                                                          |                                                                                                                                                                                                                                                                                                                   |     |                                                        |                                                                                                                                                                                                                                                                                                                                                                        |
| Coverage       | Medicine and Health                                                     |                                                                                                                                                                                                                                                                                                                   |     |                                                        |                                                                                                                                                                                                                                                                                                                                                                        |
| Date           | April 20, 2022                                                          |                                                                                                                                                                                                                                                                                                                   |     |                                                        |                                                                                                                                                                                                                                                                                                                                                                        |
| Limits         | Publication Type: "Article", Language: "English", Age: "Children <18"   |                                                                                                                                                                                                                                                                                                                   |     |                                                        |                                                                                                                                                                                                                                                                                                                                                                        |
| Search Query   | Population: Developmental Coordination Disorder<br>(combined with 'OR') |                                                                                                                                                                                                                                                                                                                   | AND | Concept: Auditory-Motor Timing<br>(combined with 'OR') |                                                                                                                                                                                                                                                                                                                                                                        |
|                | Subject Headings                                                        | Keywords                                                                                                                                                                                                                                                                                                          |     | Subject Headings                                       | Keywords                                                                                                                                                                                                                                                                                                                                                               |
|                | exp Motor Skills Disorders/                                             | Developmental coordination disorder.mp.<br>DCD.mp.<br>(developmental coordination adj3 (disorder* or problem* or dysfunction* or difficult* or impairment* or deficit*)).mp.<br>Motor skill* disorder.mp.<br>(clums* adj3 child).mp.<br>((movement* or motor) adj1 (difficult* or deficit*)).mp.<br>Dyspraxia.mp. |     | exp Acoustic Stimulation/                              | (audi* adj3 motor*).mp.<br>auditory motor adj3 (synchron* or coupling).mp.<br>((auditory or audio or percept* or rhythm*) adj7 (motor or rhythm* or cue* or tap* or stimul* or action or synchron* or entrainment or coupling or adaptation* or interaction* or integration or performance or timing or processing)).mp.<br>tap* adj5 (audi* or rhythm* or finger).mp. |
| Number of Hits | 371                                                                     |                                                                                                                                                                                                                                                                                                                   |     |                                                        |                                                                                                                                                                                                                                                                                                                                                                        |

|                |                                                                         |                                                                                                                                                                                                                                                                        |     |                                                        |                                                                                                                                                                                                                                                                                                                                                                        |
|----------------|-------------------------------------------------------------------------|------------------------------------------------------------------------------------------------------------------------------------------------------------------------------------------------------------------------------------------------------------------------|-----|--------------------------------------------------------|------------------------------------------------------------------------------------------------------------------------------------------------------------------------------------------------------------------------------------------------------------------------------------------------------------------------------------------------------------------------|
| Database       | Embase (Ovid)                                                           |                                                                                                                                                                                                                                                                        |     |                                                        |                                                                                                                                                                                                                                                                                                                                                                        |
| Coverage       | Medicine and Health                                                     |                                                                                                                                                                                                                                                                        |     |                                                        |                                                                                                                                                                                                                                                                                                                                                                        |
| Date           | April 20, 2022                                                          |                                                                                                                                                                                                                                                                        |     |                                                        |                                                                                                                                                                                                                                                                                                                                                                        |
| Limits         | Publication Type: "Article", Language: "English", Age: "Children <18"   |                                                                                                                                                                                                                                                                        |     |                                                        |                                                                                                                                                                                                                                                                                                                                                                        |
| Search Query   | Population: Developmental Coordination Disorder<br>(combined with 'OR') |                                                                                                                                                                                                                                                                        | AND | Concept: Auditory-Motor Timing<br>(combined with 'OR') |                                                                                                                                                                                                                                                                                                                                                                        |
|                | Subject Headings                                                        | Keywords                                                                                                                                                                                                                                                               |     | Subject Headings                                       | Keywords                                                                                                                                                                                                                                                                                                                                                               |
|                | exp developmental coordination disorder/                                | Motor skill* disorder.mp.<br>DCD.mp.<br>(developmental coordination adj3 (disorder* or problem* or dysfunction* or difficult* or impairment* or deficit*)).mp.<br>dyspraxia.mp.<br>(clums* adj3 child).mp.<br>((movement* or motor) adj1 (difficult* or deficit*)).mp. |     | exp auditory stimulation/                              | (audi* adj3 motor*).mp.<br>auditory motor adj3 (synchron* or coupling).mp.<br>((auditory or audio or percept* or rhythm*) adj7 (motor or rhythm* or cue* or tap* or stimul* or action or synchron* or entrainment or coupling or adaptation* or interaction* or integration or performance or timing or processing)).mp.<br>tap* adj5 (audi* or rhythm* or finger).mp. |
| Number of Hits | 361                                                                     |                                                                                                                                                                                                                                                                        |     |                                                        |                                                                                                                                                                                                                                                                                                                                                                        |

|                 |                        |  |  |  |  |
|-----------------|------------------------|--|--|--|--|
| <b>Database</b> | <b>PsycInfo (Ovid)</b> |  |  |  |  |
| <b>Coverage</b> | Psychology             |  |  |  |  |

|                |                                                                         |                                                                                                                                                                                                                                                                                          |     |                                                        |                                                                                                                                                                                                                                                                                                                                                                                                   |
|----------------|-------------------------------------------------------------------------|------------------------------------------------------------------------------------------------------------------------------------------------------------------------------------------------------------------------------------------------------------------------------------------|-----|--------------------------------------------------------|---------------------------------------------------------------------------------------------------------------------------------------------------------------------------------------------------------------------------------------------------------------------------------------------------------------------------------------------------------------------------------------------------|
| Date           | April 20, 2022                                                          |                                                                                                                                                                                                                                                                                          |     |                                                        |                                                                                                                                                                                                                                                                                                                                                                                                   |
| Limits         | Publication Type: "Article", Language: "English", Age: "Children <18"   |                                                                                                                                                                                                                                                                                          |     |                                                        |                                                                                                                                                                                                                                                                                                                                                                                                   |
| Search Query   | Population: Developmental Coordination Disorder<br>(combined with 'OR') |                                                                                                                                                                                                                                                                                          | AND | Concept: Auditory-Motor Timing<br>(combined with 'OR') |                                                                                                                                                                                                                                                                                                                                                                                                   |
|                | Subject Headings                                                        | Keywords                                                                                                                                                                                                                                                                                 |     | Subject Headings                                       | Keywords                                                                                                                                                                                                                                                                                                                                                                                          |
|                | exp<br>Dyspraxia/                                                       | Motor skill* disorder.mp.<br>DCD.mp.<br>(developmental coordination<br>adj3 (disorder* or problem*<br>or dysfunction* or difficult*<br>or impairment* or deficit*<br>or deficit*<br>)).mp.<br>(clums* adj3 child).mp.<br>((movement* or motor) adj1<br>(difficult* or deficit*<br>)).mp. |     | exp Auditory<br>Stimulation/                           | (audi* adj3 motor*).mp.<br>auditory motor adj3 (synchron* or<br>coupling).mp.<br>((auditory or audio or percept* or<br>rhythm*) adj7 (motor or rhythm*<br>or cue* or tap* or stimul* or<br>action or synchron* or entrainment<br>or coupling or adaptation* or<br>interaction* or integration or<br>performance or timing or<br>processing)).mp.<br>tap* adj5 (audi* or rhythm* or<br>finger).mp. |
| Number of Hits | 728                                                                     |                                                                                                                                                                                                                                                                                          |     |                                                        |                                                                                                                                                                                                                                                                                                                                                                                                   |

|                |                                                                         |                                                                                                                                                                                                                                |     |                                                        |                                                                                                                                                                                                                                                  |
|----------------|-------------------------------------------------------------------------|--------------------------------------------------------------------------------------------------------------------------------------------------------------------------------------------------------------------------------|-----|--------------------------------------------------------|--------------------------------------------------------------------------------------------------------------------------------------------------------------------------------------------------------------------------------------------------|
| Database       | CINAHL (EBSCO)                                                          |                                                                                                                                                                                                                                |     |                                                        |                                                                                                                                                                                                                                                  |
| Coverage       | Nursing & allied health sciences                                        |                                                                                                                                                                                                                                |     |                                                        |                                                                                                                                                                                                                                                  |
| Date           | April 20, 2022                                                          |                                                                                                                                                                                                                                |     |                                                        |                                                                                                                                                                                                                                                  |
| Limits         | Publication Type: "Article", Language: "English", Age: "Children <18"   |                                                                                                                                                                                                                                |     |                                                        |                                                                                                                                                                                                                                                  |
| Search Query   | Population: Developmental Coordination Disorder<br>(combined with 'OR') |                                                                                                                                                                                                                                | AND | Concept: Auditory-Motor Timing<br>(combined with 'OR') |                                                                                                                                                                                                                                                  |
|                | Subject Headings                                                        | Keywords                                                                                                                                                                                                                       |     | Subject Headings                                       | Keywords                                                                                                                                                                                                                                         |
|                | MH Motor Skills Disorders                                               | developmental coordination disorder OR dyspraxia OR DCD or coordination disorder OR developmental coordination OR clumsiness OR clumsy child OR movement difficult* OR movement deficit* OR motor difficult* OR motor deficit* |     | MH Auditory Perception                                 | auditory OR audio OR percept* action OR sensorimotor OR auditory motor motor OR synchron* OR coupling OR rhythmic OR cue* OR tap* OR entrainment OR adaptation* OR interaction* OR integration OR stimul* OR performance OR timing OR processing |
| Number of Hits | 108                                                                     |                                                                                                                                                                                                                                |     |                                                        |                                                                                                                                                                                                                                                  |

|          |                                                                         |     |                                                        |
|----------|-------------------------------------------------------------------------|-----|--------------------------------------------------------|
| Database | Scopus                                                                  |     |                                                        |
| Coverage | Interdisciplinary                                                       |     |                                                        |
| Date     | April 20, 2022                                                          |     |                                                        |
| Limits   | Publication Type: "Article", Language: "English", Age: "Children <18"   |     |                                                        |
|          | Population: Developmental Coordination Disorder<br>(combined with 'OR') | AND | Concept: Auditory-Motor Timing<br>(combined with 'OR') |
|          | Keywords                                                                |     | Keywords                                               |

|                       |                                                                                                                                                                                                                                                                                |                                                                                                                                                                                                                                                                                                                                                                                                                       |
|-----------------------|--------------------------------------------------------------------------------------------------------------------------------------------------------------------------------------------------------------------------------------------------------------------------------|-----------------------------------------------------------------------------------------------------------------------------------------------------------------------------------------------------------------------------------------------------------------------------------------------------------------------------------------------------------------------------------------------------------------------|
| <b>Search Query</b>   | {developmental coordination disorder} OR {DCD} OR {dyspraxia} OR "motor skill* disorder" OR "clumsiness" OR "coordination disorder" OR "developmental coordination" OR "clumsy child" OR "movement difficult*" OR "movement deficit*" OR "motor difficult*" OR "motor deficit" | "auditory motor synchron*" OR "audi* motor" OR "percept* action" OR "auditory stimul*" OR "rhythmic synchron*" OR "sensorimotor synchron*" OR "rhythm* tap*" OR "auditory cue*" OR "auditory motor coupling" OR "auditory motor entrainment" OR "audi* motor adaptation*" OR "audi* motor interaction*" OR "audi* motor integration" OR "audi* motor timing" OR "audi* motor processing" OR "audi* motor performance" |
| <b>Number of Hits</b> | 105                                                                                                                                                                                                                                                                            |                                                                                                                                                                                                                                                                                                                                                                                                                       |

**Supplementary Table S2: Title and Abstract Screening.**

|                                                         | <b>Exclusion Criteria</b>                                                                                                                 | <b>YES</b> | <b>NO</b> | <b>Maybe</b> |
|---------------------------------------------------------|-------------------------------------------------------------------------------------------------------------------------------------------|------------|-----------|--------------|
| 1                                                       | Does the title/abstract identify the paper as a review or a survey study?                                                                 |            |           |              |
| 2                                                       | Does the title/abstract identify the study as a conference proceeding, meeting minute, commentary, postscript, letter or in video format? |            |           |              |
| 3                                                       | Are participants in the study adults (above 18 y.o.)?                                                                                     |            |           |              |
| 4                                                       | Is the paper published in a language other than English?                                                                                  |            |           |              |
| <b>If "Yes" to any of the above, exclude the study.</b> |                                                                                                                                           |            |           |              |
|                                                         | <b>Inclusion Criteria</b>                                                                                                                 |            |           |              |
| 5                                                       | Does the title/abstract mention the effects of auditory stimuli on motor performance?                                                     |            |           |              |
| 6                                                       | Does the title/abstract mention children (<18 years) with motor coordination difficulties?                                                |            |           |              |

If the reviewer's answer is "No" or "Maybe" to questions 1-4, a full-text article will be reviewed for decision-making on this level. If the reviewer's answer is "Yes" or "Maybe" to questions 5 and 6, the full-text article will be reviewed for decision-making on this level.

**Supplementary Table S3. Full-Text Screening.**

|   | <b>Reasons for Exclusion</b>                                                                                                                    | <b>✓</b> |
|---|-------------------------------------------------------------------------------------------------------------------------------------------------|----------|
| 1 | The study did not report the effects of auditory stimuli on motor performance.                                                                  |          |
| 2 | The primary outcome measure was not related to motor performance (e.g., the primary goal of the study was an evaluation of a treatment method). |          |

|   | <b>Sources Excluded</b>                                                                                                                                                                                                                                                      | <b>Primary Reason of Exclusion</b> |
|---|------------------------------------------------------------------------------------------------------------------------------------------------------------------------------------------------------------------------------------------------------------------------------|------------------------------------|
| 1 | Biotteau, M., Chaix, Y., & Albaret, J. M. (2015). Procedural learning and automatization process in children with developmental coordination disorder and/or developmental dyslexia. <i>Human movement science</i> , 43, 78-89.                                              | 1                                  |
| 2 | Caçola, P., Getchell, N., Srinivasan, D., Alexandrakis, G., & Liu, H. (2018). Cortical activity in fine-motor tasks in children with developmental coordination disorder: a preliminary fNIRS study. <i>International Journal of Developmental Neuroscience</i> , 65, 83-90. | 1                                  |
| 3 | Chang, A., Li, Y. C., Chan, J. F., Dotov, D. G., Cairney, J., & Trainor, L. J. (2021). Inferior auditory time perception in children with motor difficulties. <i>Child Development</i> , 92(5), e907-e923.                                                                   | 2                                  |

|    |                                                                                                                                                                                                                                                                                                                           |   |
|----|---------------------------------------------------------------------------------------------------------------------------------------------------------------------------------------------------------------------------------------------------------------------------------------------------------------------------|---|
| 4  | Cosper, S. M., Lee, G. P., Peters, S. B., & Bishop, E. (2009). Interactive Metronome training in children with attention deficit and developmental coordination disorders. <i>International Journal of Rehabilitation Research</i> , 32(4), 331-336.                                                                      | 2 |
| 5  | de Castelnau, P., Albaret, J. M., Chaix, Y., & Zanone, P. G. (2008). A study of EEG coherence in DCD children during motor synchronization task. <i>Human Movement Science</i> , 27(2), 230-241.                                                                                                                          | 1 |
| 6  | Hession, C. E., Law Smith, M. J., Watterson, D., Oxley, N., & Murphy, B. A. (2019). The Impact of equine therapy and an audio-visual approach emphasizing rhythm and beat perception in children with developmental coordination disorder. <i>The Journal of Alternative and Complementary Medicine</i> , 25(5), 535-541. | 2 |
| 7  | Holeckova, I., Cepicka, L., Mautner, P., Stepanek, D., & Moucek, R. (2014). Auditory ERPs in children with developmental coordination disorder. <i>Activitas Nervosa Superior</i> , 56(1), 37-44.                                                                                                                         | 2 |
| 8  | King, B. R., Kagerer, F. A., Harring, J. R., Contreras-Vidal, J. L., & Clark, J. E. (2011). Multisensory adaptation of spatial-to-motor transformations in children with developmental coordination disorder. <i>Experimental brain research</i> , 212(2), 257-265.                                                       | 1 |
| 9  | Lê, M., Blais, M., Jucla, M., Chauveau, N., Maziero, S., Biotteau, M., ... & Tallet, J. (2021). Procedural learning and retention of audio-verbal temporal sequence is altered in children with developmental coordination disorder but cortical thickness matters. <i>Developmental Science</i> , 24(1), e13009.         | 1 |
| 10 | Leemrijse, C., Meijer, O. G., Vermeer, A., Adèr, H. J., & Diemel, S. (2000). The efficacy of Le Bon Départ and Sensory Integration treatment for children with developmental coordination disorder: a randomized study with six single cases. <i>Clinical Rehabilitation</i> , 14(3), 247-259.                            | 2 |
| 11 | Mikami, M., Hirota, T., Takahashi, M., Adachi, M., Saito, M., Koeda, S., ... & Yamada, J. (2021). Atypical sensory processing profiles and their associations with motor problems in preschoolers with developmental coordination disorder. <i>Child Psychiatry &amp; Human Development</i> , 52(2), 311-320.             | 1 |
| 12 | Niklasson, M., Niklasson, I., & Norlander, T. (2009). Sensorimotor therapy: using stereotypic movements and vestibular stimulation to increase sensorimotor proficiency of children with attentional and motor difficulties. <i>Perceptual and Motor Skills</i> , 108(3), 643-669.                                        | 1 |
| 13 | Niklasson, M., Norlander, T., Niklasson, I., & Rasmussen, P. (2017). Catching-up: Children with developmental coordination disorder compared to healthy children before and after sensorimotor therapy. <i>PloS one</i> , 12(10), e0186126.                                                                               | 1 |
| 14 | Piek, J. P., & Skinner, R. A. (1999). Timing and force control during a sequential tapping task in children with and without motor coordination problems. <i>Journal of the International Neuropsychological Society</i> , 5(4), 320-329.                                                                                 | 1 |
| 15 | Sartori, R. F., Valentini, N. C., Nobre, G. C., & Fonseca, R. P. (2021). Motor and verbal inhibitory control: Development and validity of the go/No-Go app test for children with development coordination disorder. <i>Applied Neuropsychology: Child</i> , 10(4), 359-368.                                              | 1 |
| 16 | Volman, M. J. M., & Geuze, R. H. (1998). Stability of rhythmic finger movements in children with a developmental coordination disorder. <i>Motor Control</i> , 2(1), 34-60.                                                                                                                                               | 1 |
